# Supplementary material
Source: PubMed Central journal article supplement (PMC8532198)
Supplement: blood_BLD2020009871_s1.pdf [file blood_BLD2020009871_s1.pdf]

## **Supplementary Materials (Duault *et al.*)**

### **Activated Natural Killer Cells Predict Poor Clinical Prognosis in High-risk B- and T- cell Acute Lymphoblastic Leukemia**

#### **Inventory**

- Supplementary Figures S1-S14
- Supplementary Tables S1-S5

**Figure S1:** Manual gating strategy for CyTOF analysis of BMDC and PBMC

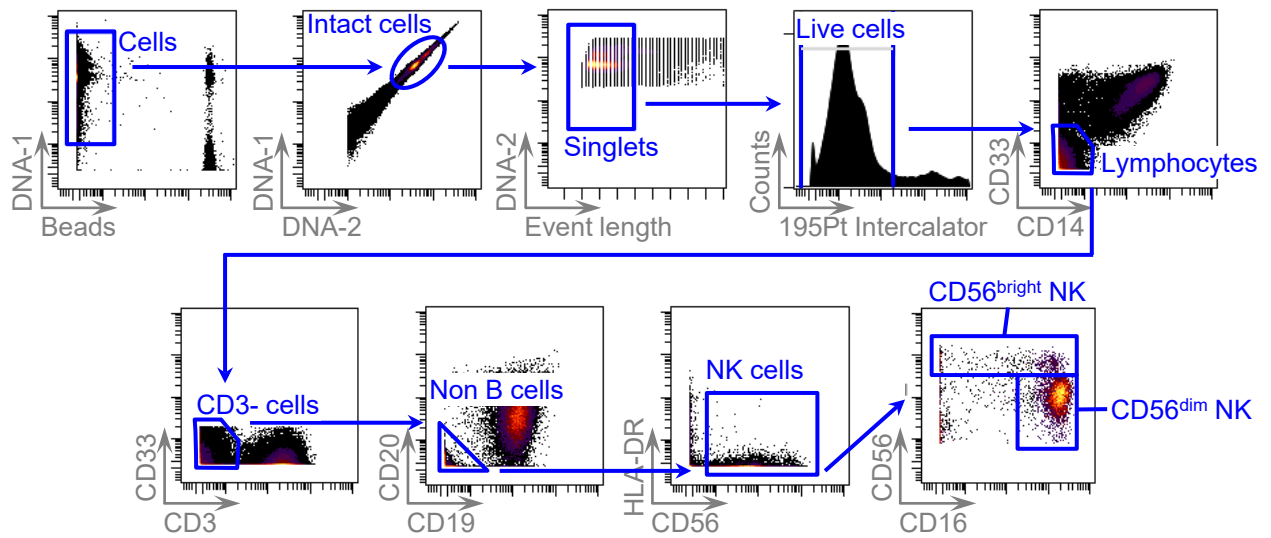

**Figure S1: Manual gating strategy for CyTOF analysis of BMDC and PBMC.** From the live intact singlet population, NK cells were gated as non-monocyte (Lymphocytes gate), non-T cell (CD3- cells gate), non-B cell (Non B cells gate), CD56<sup>+</sup> HLA-DR<sup>-</sup> cells, and then subdivided in CD56<sup>bright</sup> and CD56<sup>dim</sup> NK cells according to their surface expression of CD56 and CD16.

**Figure S2:** *Increased cell death and reduced proliferation are not responsible for reduced NK frequencies in the B/T-ALL microenvironment*

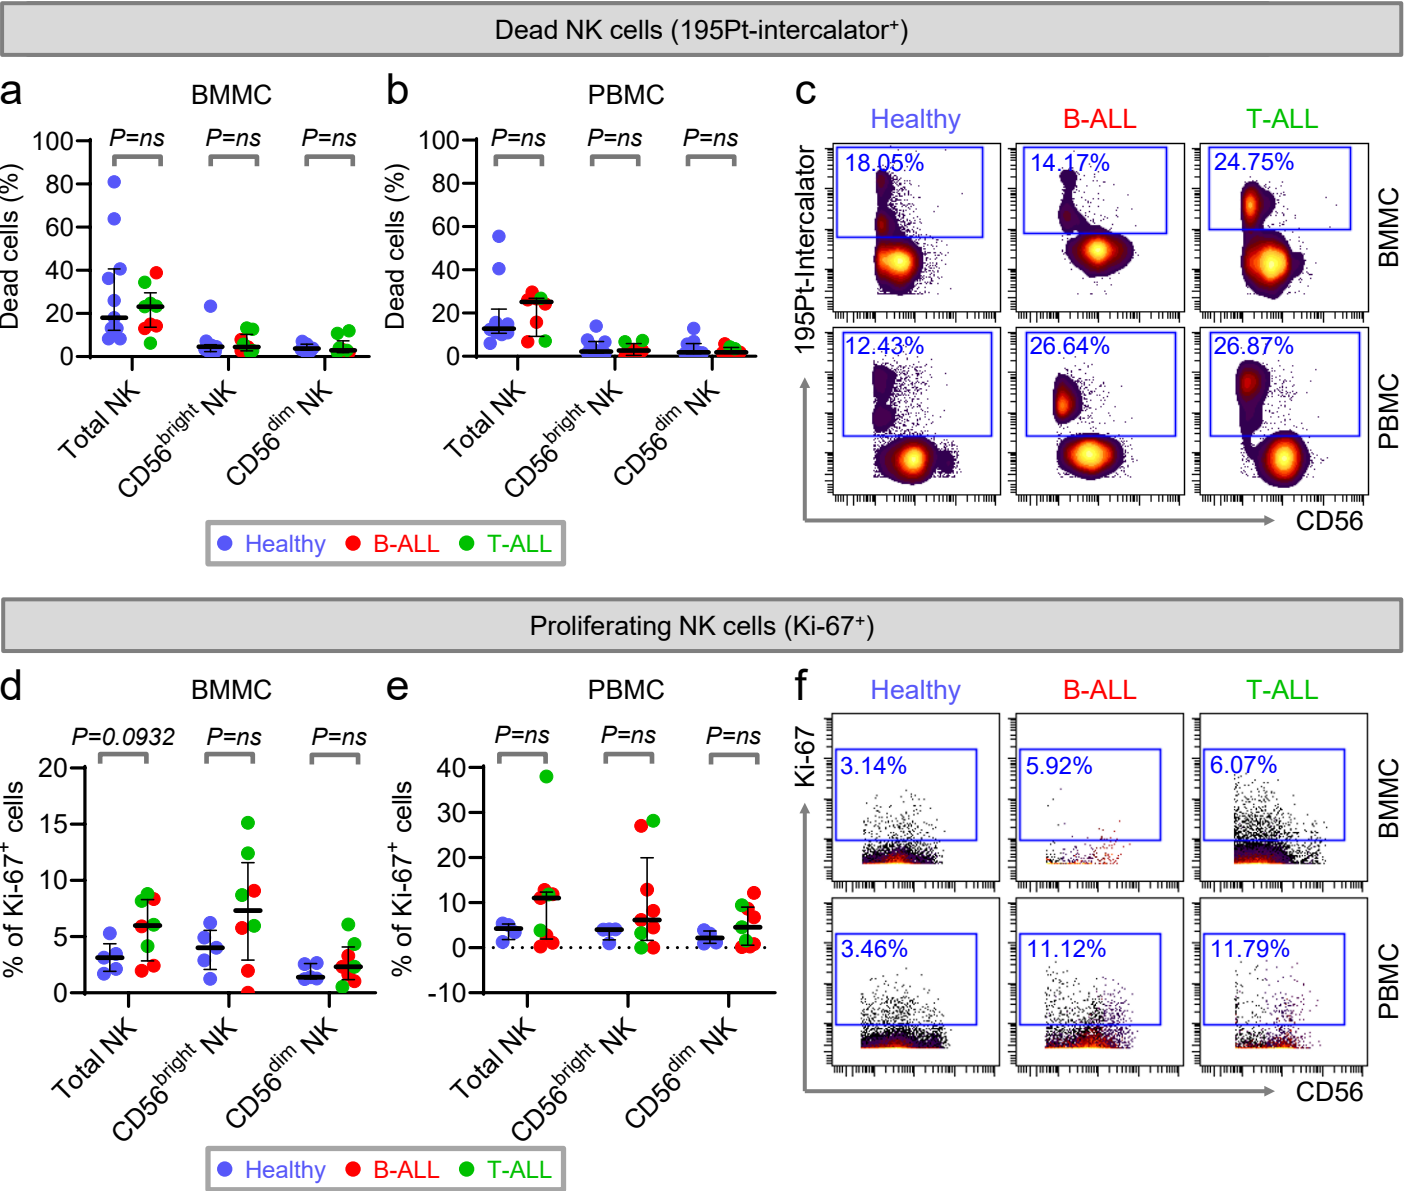

**Figure S2: Increased cell death and reduced proliferation are not responsible for reduced NK frequencies in the B/T-ALL microenvironment.** (a-c) Proportion of dead cells in Total NK cells and NK subsets in BMMC (a), and PBMC (b), and representative dot plots (c), of healthy donors (n=11 BMMC, n=10 PBMC) and B/T-ALL patients (n=9 BMMC, n=8 PBMC) calculated by CyTOF. (d-f) Proportion of Ki-67<sup>+</sup> proliferating total NK cells and NK subsets in BMMC (d), and PBMC (e), and representative dot plots (f), of healthy donors (n=5 BMMC, n=4 PBMC) and B/T-ALL patients (n=8 BMMC, n=9 PBMC) calculated by CyTOF. Graphs show median ± interquartile range. Exact p-values have been calculated using the Mann-Whitney test, ns=non-significant.

**Figure S3:** Purity assessment of sorted NK cells from healthy donors and B/T-ALL patients

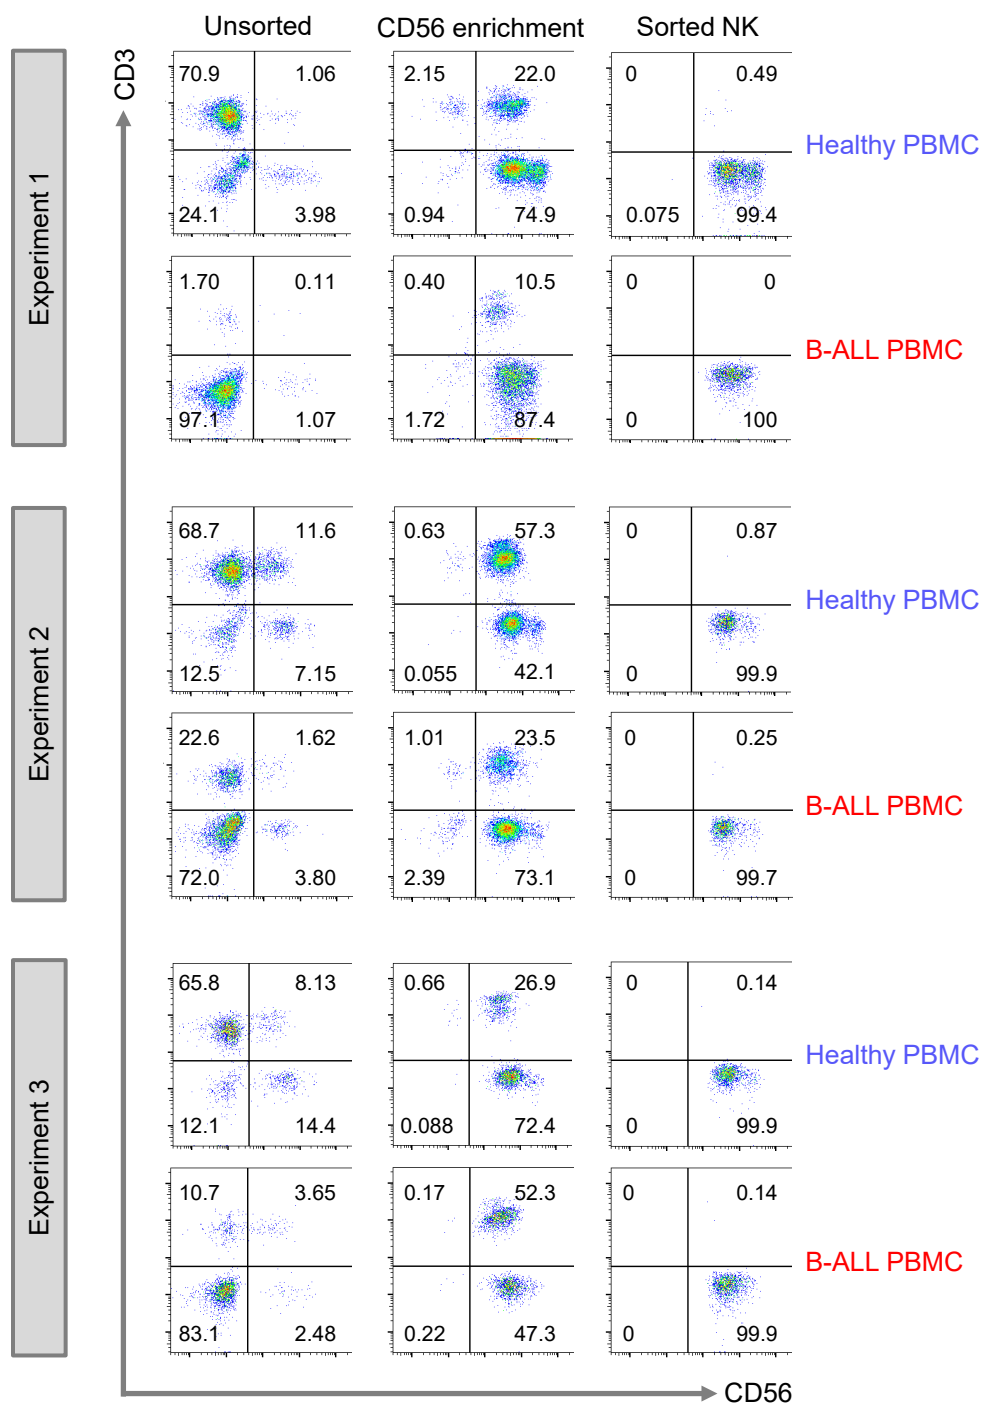

**Figure S3: Purity assessment of sorted NK cells from healthy donors and B/T-ALL patients.** Flow cytometry dot plots showing percentages of NK cells in PBMC of healthy donors (n=3) and B/T-ALL patients (n=3) before sorting (unsorted), after separation of total CD56<sup>+</sup> cells using release CD56 microbeads (CD56 enrichment), and after automated cell sorting of CD56-enriched cells to obtain CD3<sup>+</sup>CD56<sup>+</sup> NK cells (sorted NK).

**Figure S4:** Differentially regulated genes between  $CD56^{bright}$  and  $CD56^{dim}$  NK subsets (GSE21774)

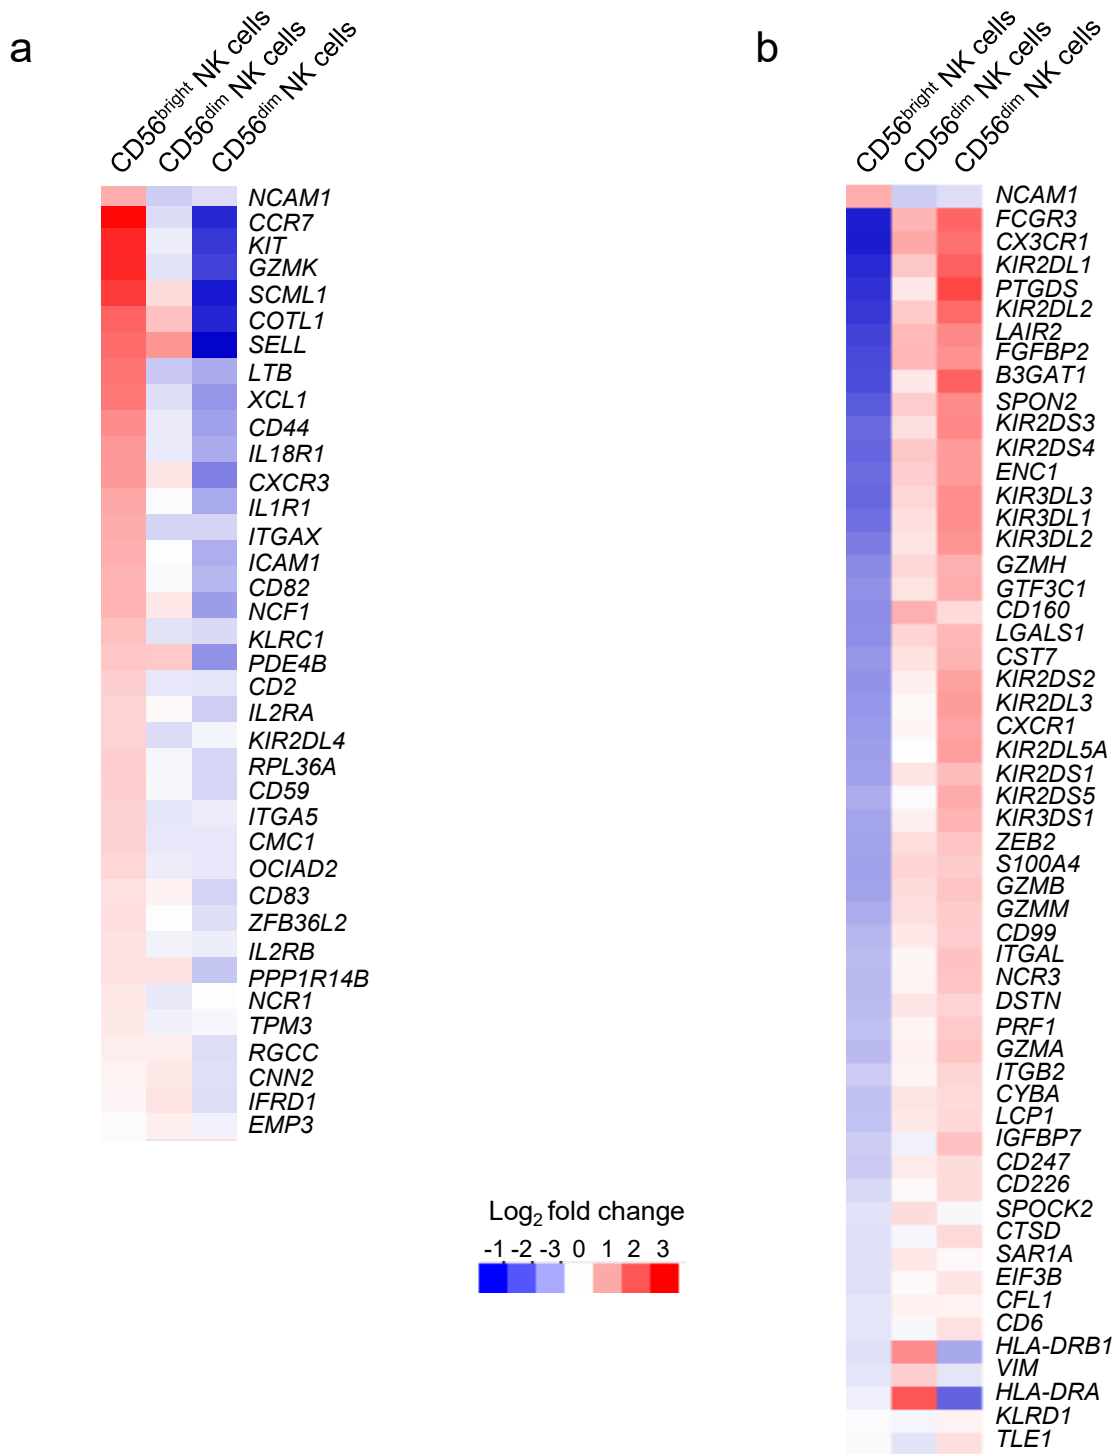

**Figure S4: Differentially regulated genes between  $CD56^{bright}$  and  $CD56^{dim}$  NK subsets (GSE21774).** (a-b) Heatmaps depicting selected well-known differentially regulated genes between  $CD56^{bright}$  and  $CD56^{dim}$  NK subsets in the GSE21774 reference matrix used in CIBERSORT in Figs. 2a-b.

**Figure S5:** Changes in frequencies of CD56<sup>bright</sup> and CD56<sup>dim</sup> NK cells in high-risk B/T-ALL

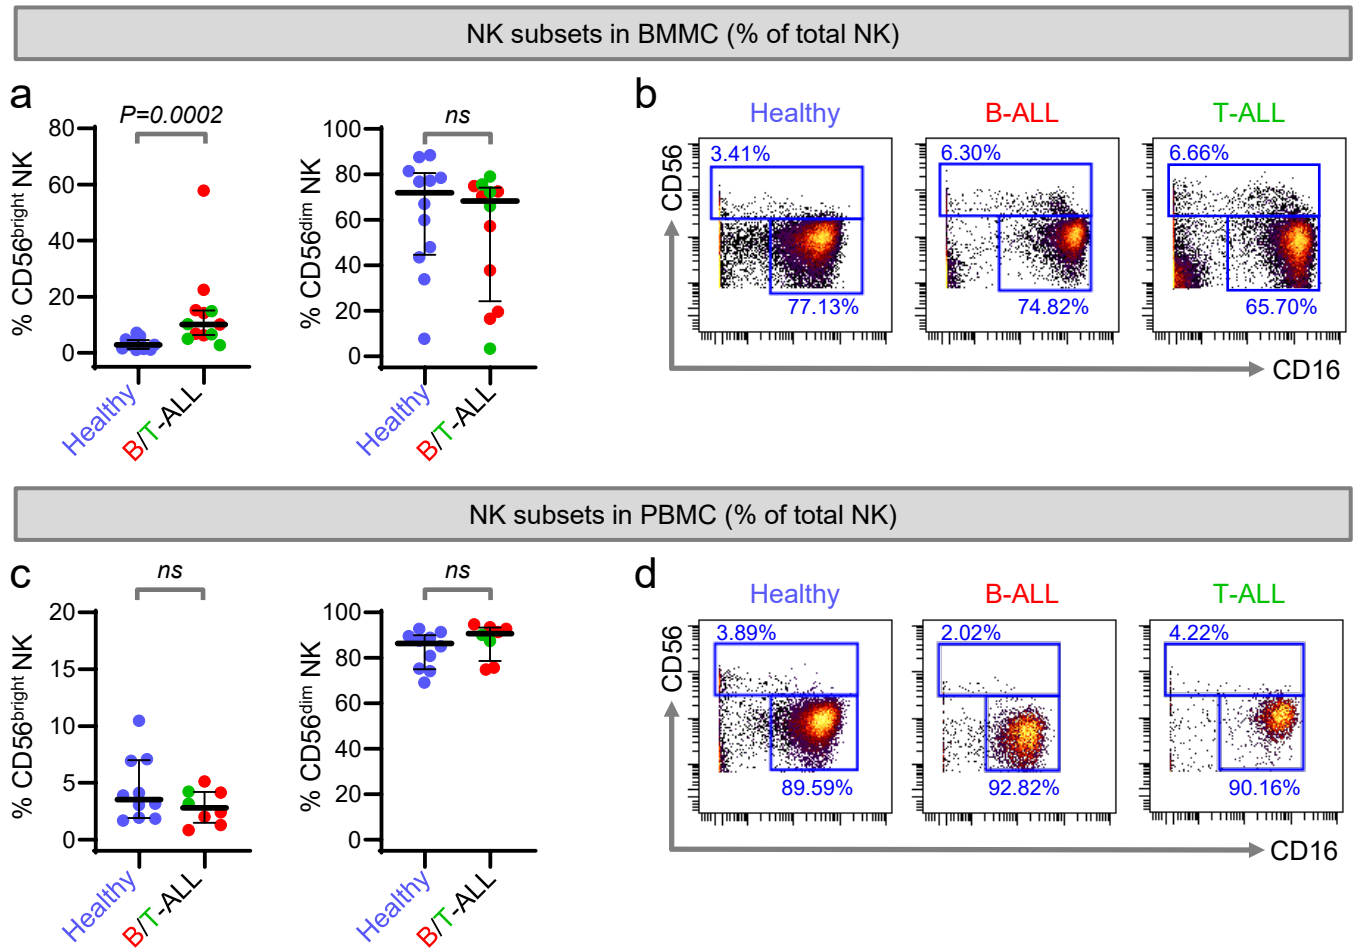

**Figure S5: Changes in frequencies of CD56<sup>bright</sup> and CD56<sup>dim</sup> NK cells in high-risk B/T-ALL.** (a-b) Comparison of percentages (a), and representative dot plots (b) of CD56<sup>bright</sup> NK and CD56<sup>dim</sup> NK cells in BMMC of healthy donors (n=12) and B/T-ALL patients (n=12) by CyTOF. (c-d) Comparison of percentages (c), and representative dot plots (d) of CD56<sup>bright</sup> NK, and CD56<sup>dim</sup> NK cells in PBMC of healthy donors (n=10) and B/T-ALL patients (n=8). All NK subsets are shown as percentages of total NK cells. Graphs show median  $\pm$  interquartile range. Exact p-values were calculated using the Mann-Whitney test. ns = non-significant.

**Figure S6:** *Changes in NKp46, CD27, and CD57 expression in unstimulated NK cells between B/T-ALL patients and healthy donors*

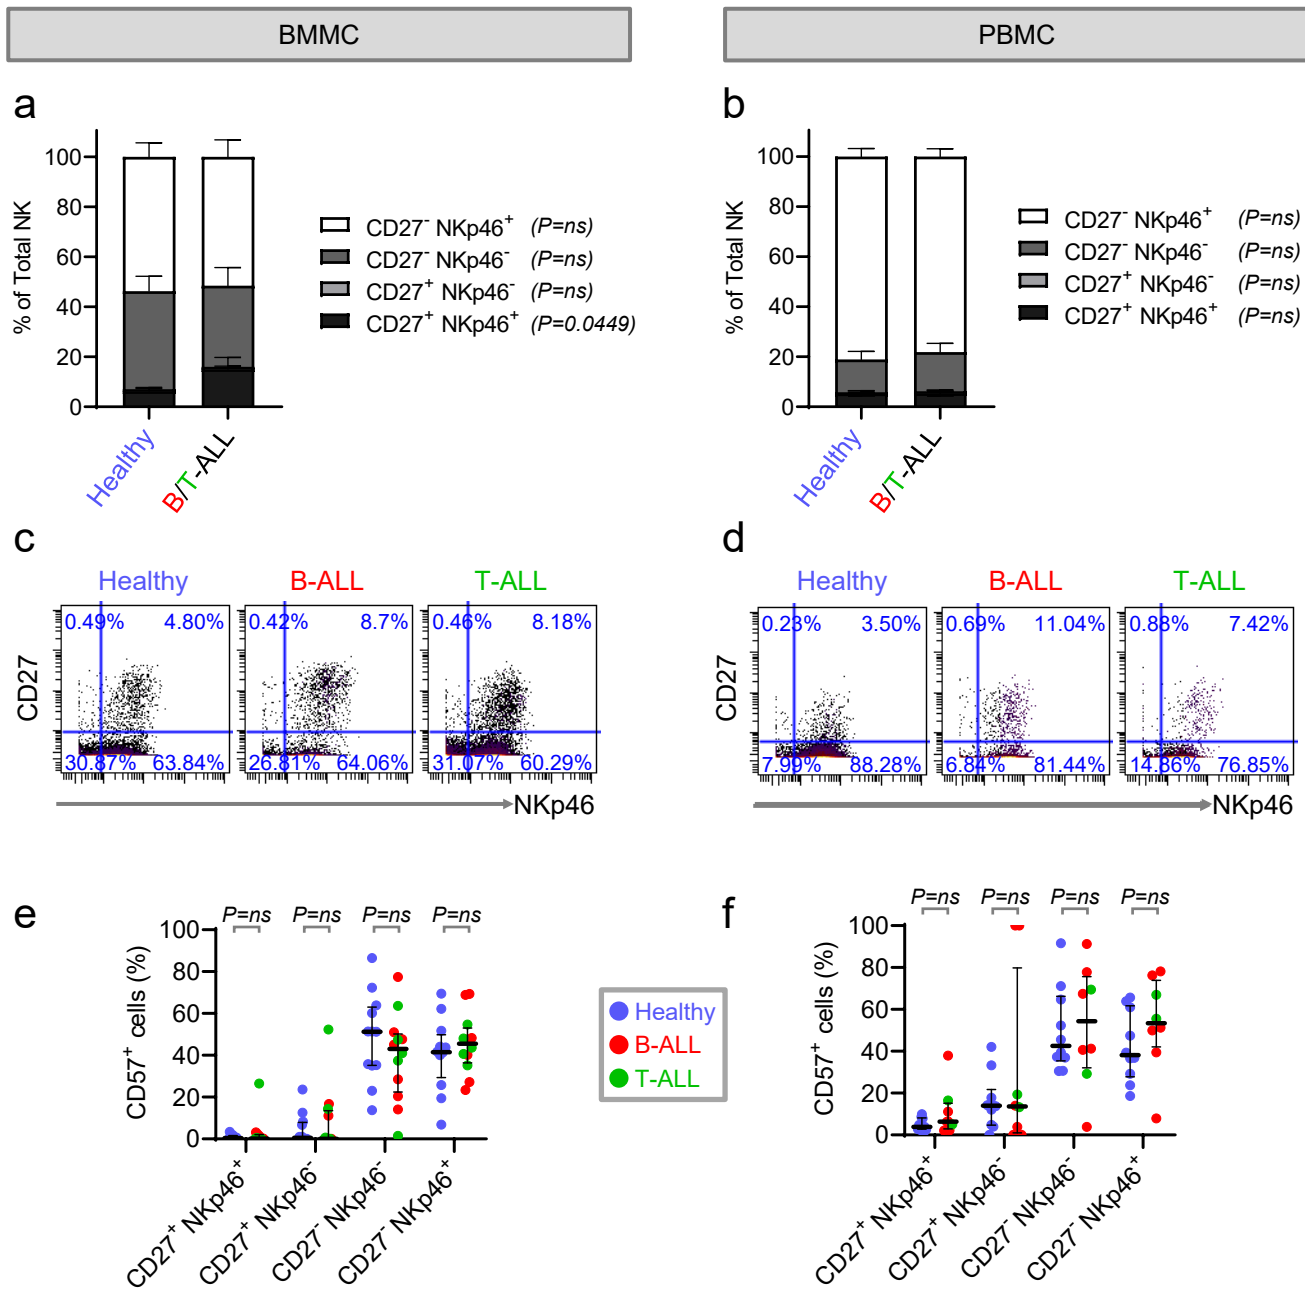

**Figure S6: Changes in NKp46, CD27 and CD57 expression in unstimulated NK cells between B/T-ALL patients and healthy donors.** (a-b) CD27 vs NKp46 expression analysis by CyTOF in total NK cells of BMNC (a) and PBMC (b) of B/T-ALL patients (BMNC, n=12; PBMC, n=8) compared to healthy individuals (BMNC, n=12; PBMC, n=10). Graphs show mean + SEM for each subset. (c-d) Representative dot plots of the expression of CD27 vs NKp46 on total NK cells in BMNC (c) and PBMC (d) of healthy control and B/T-ALL patients. (e-f) CD57 expression on subsets defined by CD27 and NKp46 expression as described in (a-b). Graphs show median  $\pm$  interquartile range. Exact p-values were calculated using the Mann-Whitney test, ns= not significant.

**Figure S7:** Gating strategy for flow cytometry analysis of PBMC

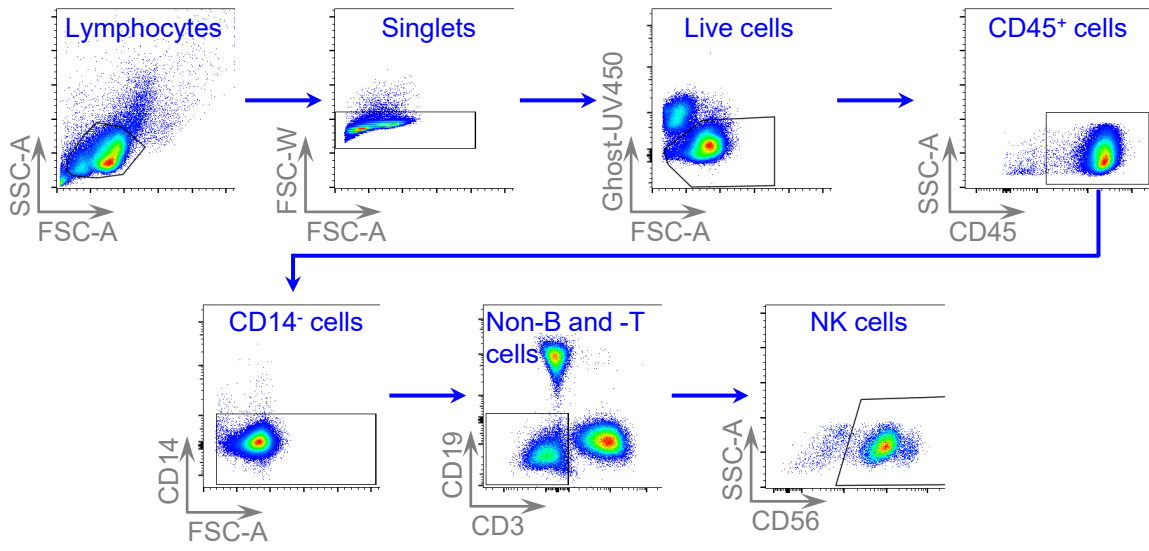

**Figure S7: Gating strategy for flow cytometry analysis of PBMC.** From the lymphocyte cluster; singlets were gated followed by selection of live (Ghost-UV450<sup>-</sup>) and CD45<sup>+</sup> populations. Monocytes were then gated out (CD14<sup>-</sup> gate), followed by the non-B and non-T cell gate (CD19<sup>-</sup>CD3<sup>-</sup>). From non-B non-T and non-monocyte populations, CD56<sup>+</sup> NK cells were selected for downstream gating of surface markers.



**Figure S8:** Cytokine production in stimulated BMMC and PBMC NK cells of B/T-ALL patients

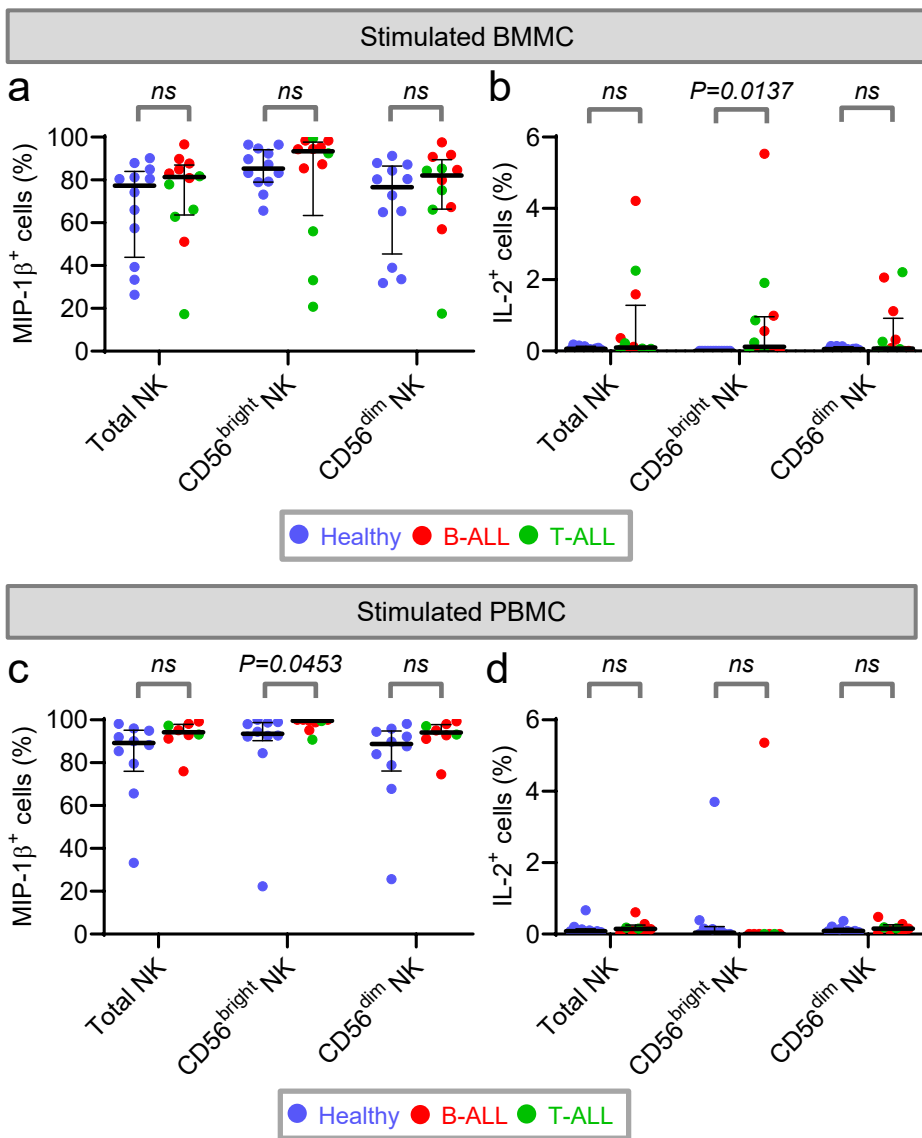

**Figure S8: Cytokine production in stimulated BMMC and PBMC NK cells of B/T-ALL patients.** (a-d) Frequencies of PMA/Ionomycin-stimulated cells expressing MIP-1 $\beta$  (a,c) and IL-2 (b,d) in total NK and NK subsets in BMMC (a-b) and PBMC (c-d) of B/T-ALL patients (BMMC, n=12; PBMC, n=8) and healthy donors (BMMC, n=12; PBMC, n=10). (e-f) Representative dot plots for stimulated total NK cells expressing MIP-1 $\beta$  and IL-2 in BMMC (e) and PBMC (f) of B/T-ALL patients. Graphs show median  $\pm$  interquartile range. Exact p-values were calculated using Mann-Whitney test, ns = not significant.

**e** Total NK (Stimulated BMMC)

**f** Total NK (Stimulated PBMC)

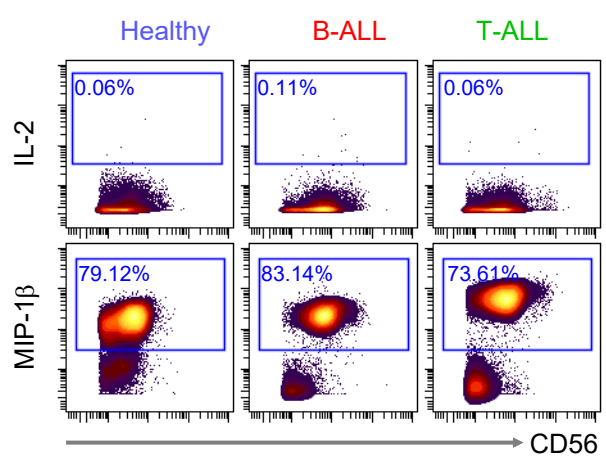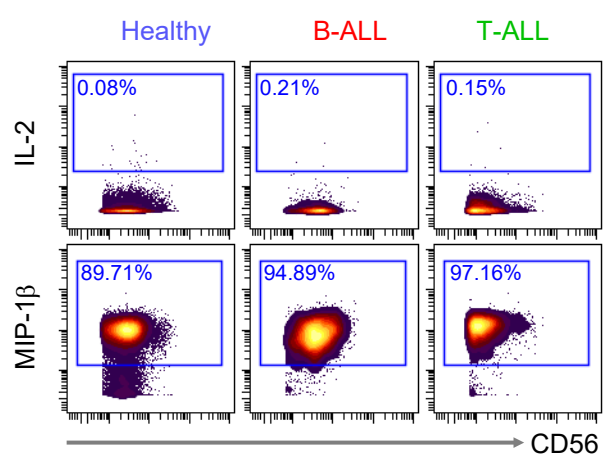

**Figure S9:** Comparison of cytotoxic granules and degranulation of NK cells between B/T-ALL patients and healthy donors

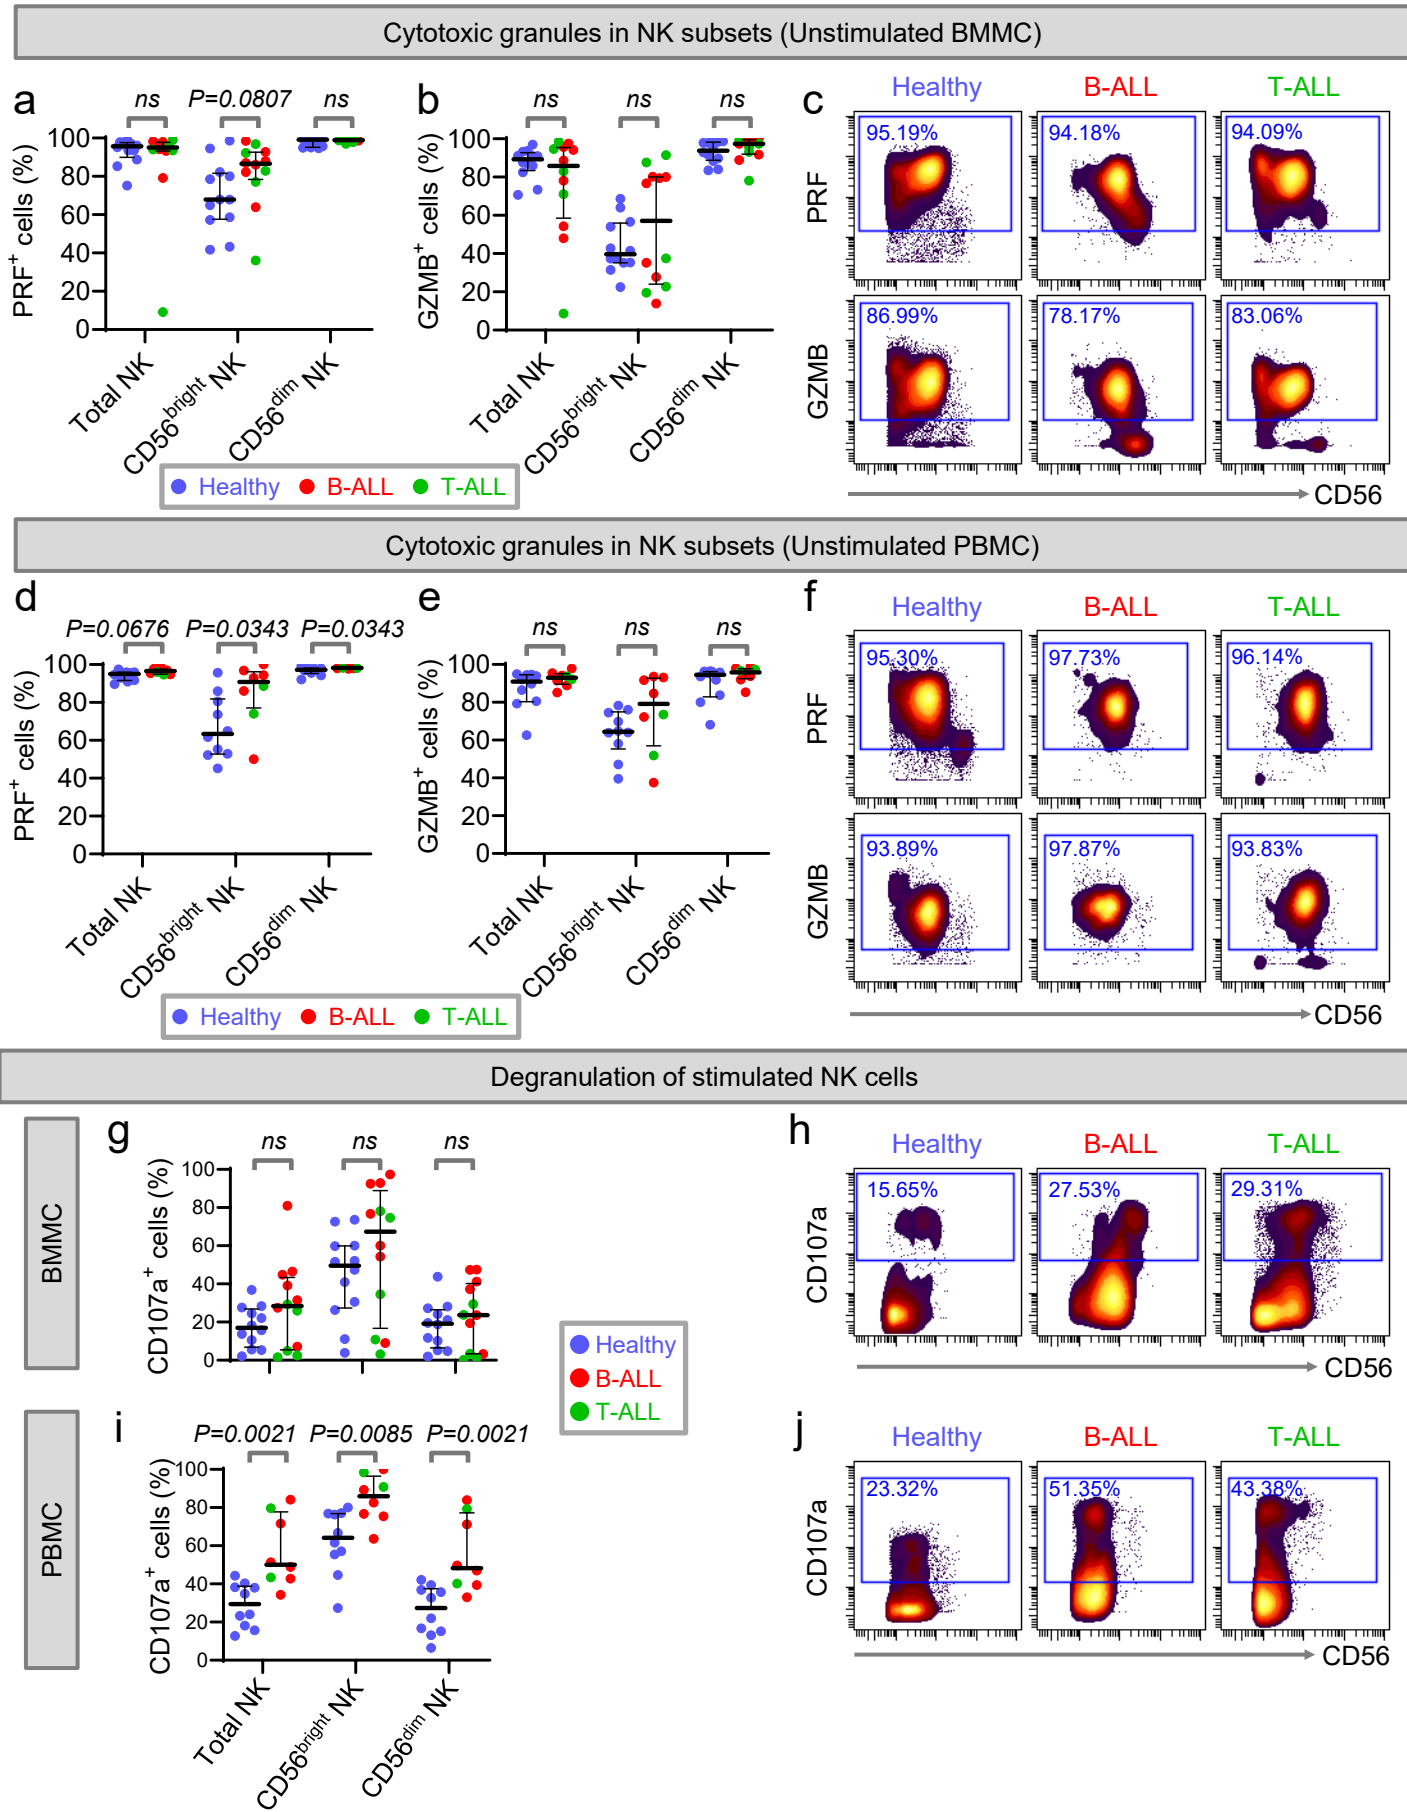

**Figure S9: Comparison of cytotoxic granules and degranulation of NK cells between B/T-ALL patients and healthy donors.** (a-b) Frequencies of cells expressing perforin (PRF, (a)) and granzyme B (GZMB, (b)) in unstimulated total NK cells and NK subsets in BMMC of B/T-ALL patients (n=12) and healthy donors (n=12). (c) Representative density plots showing PRF and GZMB vs CD56 expression in unstimulated total NK cells in BMMC of B/T-ALL patients and healthy donors. (d-e) Frequencies of cells expressing PRF (d) and GZMB (e) in unstimulated total NK cells and NK subsets in PBMC of B/T-ALL patients (n=8) and healthy donors (n=10). (f) Representative density plots showing PRF and GZMB vs CD56 expression in unstimulated total NK cells in PBMC of B/T-ALL patients and healthy donors. (g-j) Comparison of frequencies (g, i) and representative density plots (h, j) of PMA/Ionomycin-stimulated NK cell subsets expressing CD107a in BMMC (g-h) and PBMC (i-j) of healthy donors (BMMC: n=12, PBMC: n=10) and B/T-ALL patients (BMMC: n=12, PBMC: n=8) by CyTOF. Graphs show median  $\pm$  interquartile range. Exact p-values were calculated using Mann-Whitney test, ns=not significant.

**Figure S10:** Comparison of expression of immune checkpoints in BMMC of ALL patients and healthy donors

Expression of immune checkpoints in unstimulated total NK cells (BMMC)

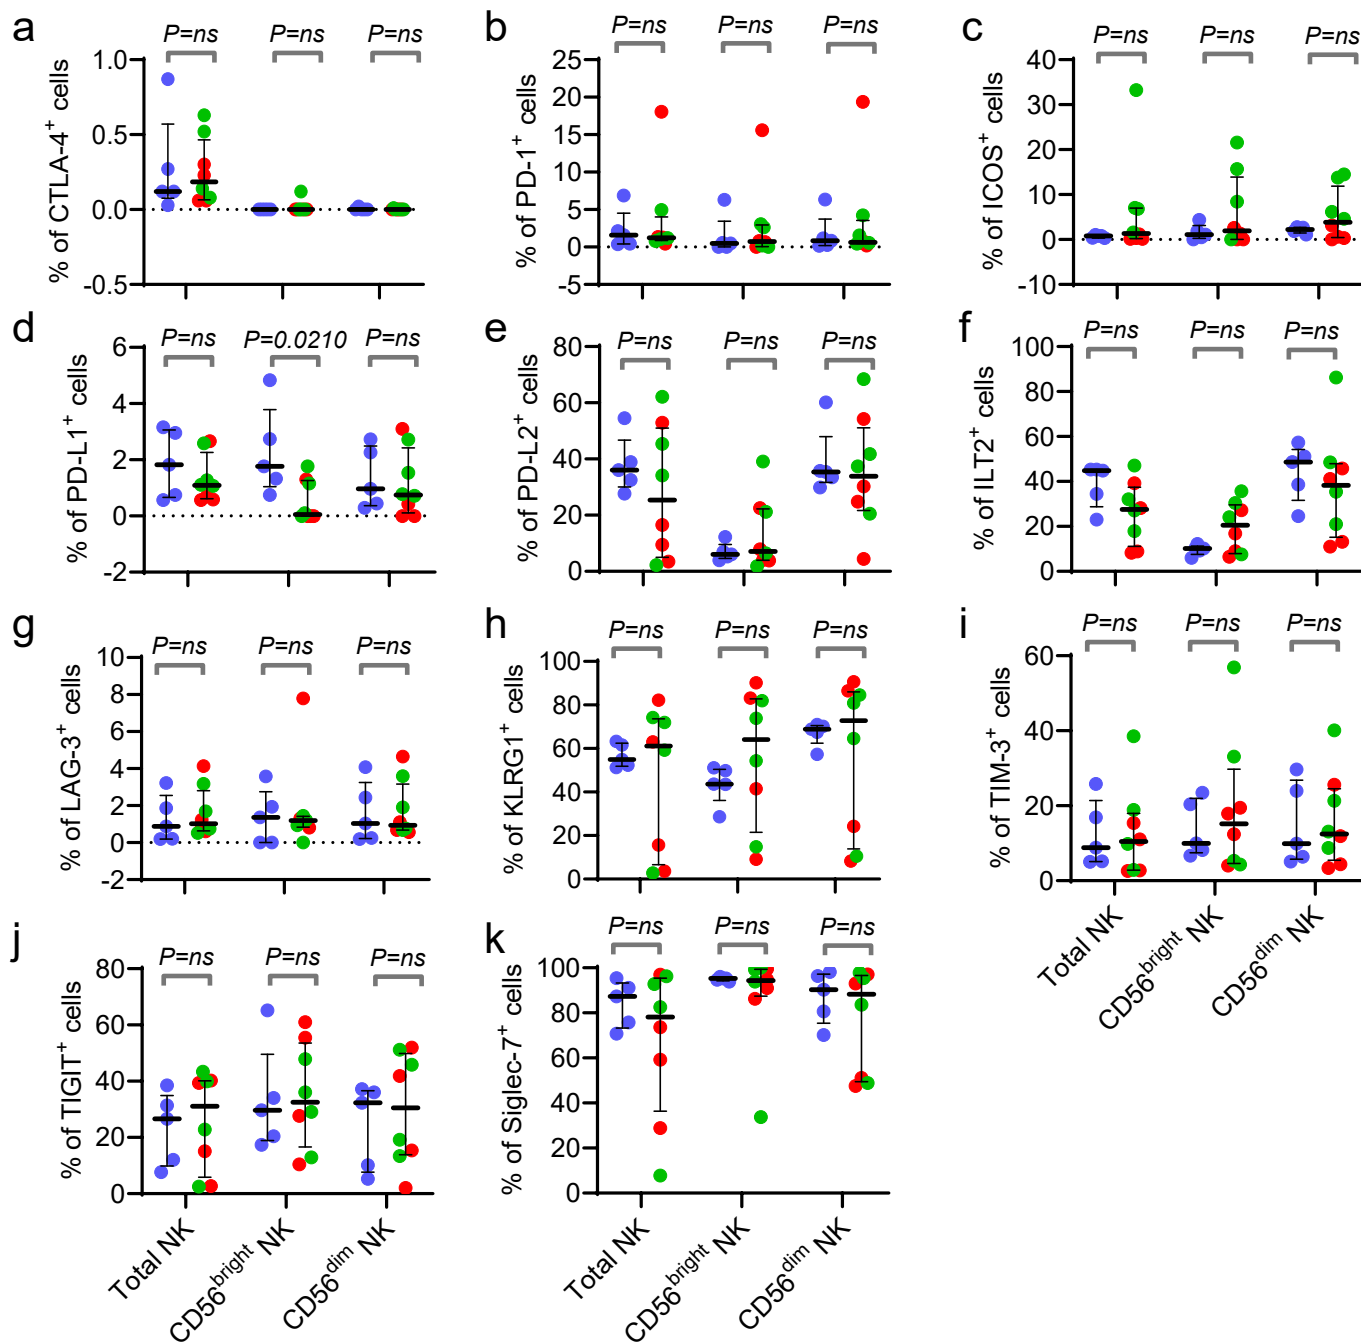

**Figure S10: Comparison of expression of immune checkpoints in BMMC of ALL patients and healthy donors.** (a-k) Comparison of the proportions of total NK cells or CD56<sup>bright</sup>, CD56<sup>dim</sup> NK subsets expressing CTLA-4 (a), PD-1 (b), ICOS (c), PD-L1 (d), PD-L2 (e), ILT2 (f), LAG-3 (g), KLRG1 (h), TIM-3 (i), TIGIT (j), and Siglec-7 (k) in healthy donors (n=5) and B/T-ALL patients (n=8) by CyTOF. Graphs show median  $\pm$  interquartile range. Exact p-values were calculated using Mann-Whitney test, ns=not significant.

**Figure S11:** Comparison of expression of immune checkpoints in PBMC of ALL patients and healthy donors

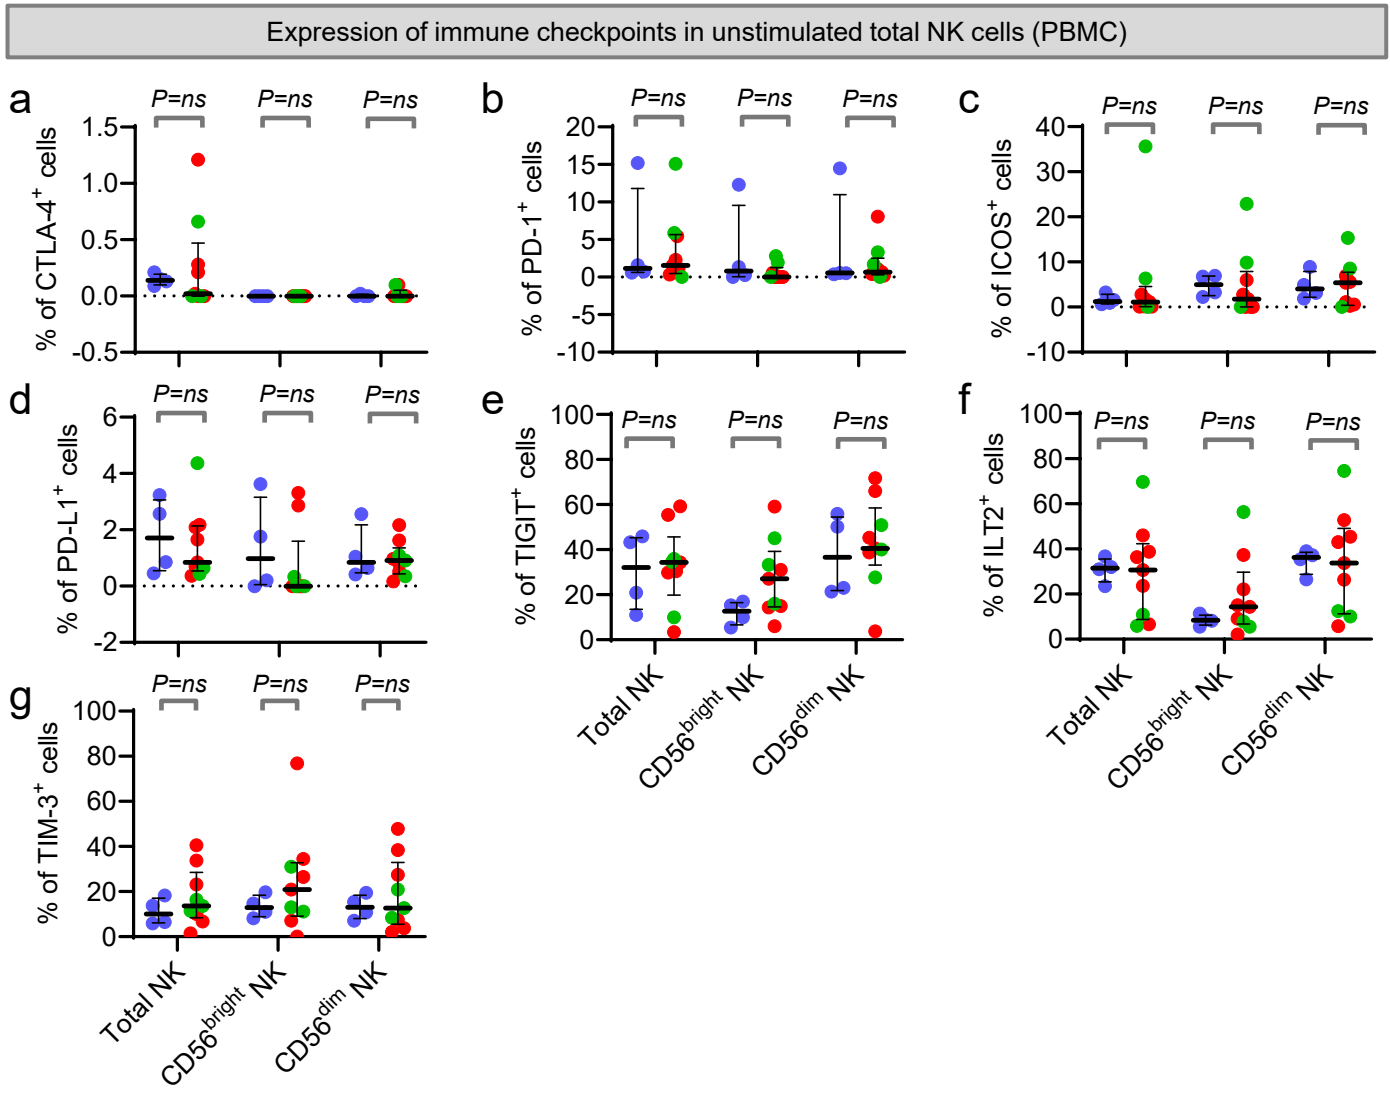

**Figure S11: Comparison of expression of immune checkpoints in PBMC of ALL patients and healthy donors.** (a-g) Comparison of the proportions of Total NK cells or CD56<sup>bright</sup>, CD56<sup>dim</sup> NK subsets expressing CTLA-4 (a), PD-1 (b), ICOS (c), PD-L1 (d), TIGIT (e), ILT2 (f), and TIM-3 (g) in healthy donors (n=4) and B/T-ALL patients (n=9) by CyTOF. Graphs show median ± interquartile range. Exact p-values were calculated using Mann-Whitney test, ns=not significant.

**Figure S12:** Gene expression signature of resting and activated NK subsets in LM22 CIBERSORT reference matrix

**a**

| Up regulated genes in Resting NK Cells (more than 2-fold change) |      |          |      |          |      |           |       |
|------------------------------------------------------------------|------|----------|------|----------|------|-----------|-------|
| CHST15                                                           | 2.00 | MNDA     | 2.62 | AZU1     | 3.46 | P2RY13    | 5.56  |
| BEND5                                                            | 2.00 | IGKC     | 2.66 | ZFP36L2  | 3.47 | LILRB2    | 5.58  |
| CD2                                                              | 2.01 | PLEKHG3  | 2.69 | SELL     | 3.60 | CHI3L1    | 5.77  |
| ADAM28                                                           | 2.05 | ZAP70    | 2.69 | CD160    | 3.63 | DENND5B   | 5.83  |
| ATHL1                                                            | 2.05 | PBXIP1   | 2.70 | PIK3IP1  | 3.72 | RNASE6    | 5.88  |
| HCK                                                              | 2.12 | TCF7     | 2.73 | FCN1     | 3.81 | CEACAM8   | 5.89  |
| CLC                                                              | 2.14 | CDH12    | 2.78 | LIME1    | 3.82 | LAG3      | 5.95  |
| CD3G                                                             | 2.15 | CLEC2D   | 2.84 | CRISP3   | 3.92 | HIST1H2BG | 6.09  |
| PPBP                                                             | 2.16 | LRMP     | 2.85 | ZBP1     | 3.93 | PDE6C     | 6.23  |
| PPFIBP1                                                          | 2.22 | NCF2     | 2.86 | FLJ13197 | 3.98 | CCDC102B  | 6.53  |
| C1orf54                                                          | 2.22 | RNASE2   | 2.88 | DHX58    | 4.27 | MGAM      | 6.57  |
| MBL2                                                             | 2.23 | CTSG     | 2.93 | TTC38    | 4.37 | CD68      | 6.73  |
| KLRC3                                                            | 2.24 | TLR7     | 2.93 | ELANE    | 4.37 | HK3       | 6.86  |
| FAM65B                                                           | 2.27 | ABCB4    | 3.00 | HTR2B    | 4.45 | AQP9      | 7.43  |
| LST1                                                             | 2.31 | ARHGAP22 | 3.00 | PADI4    | 4.45 | SEC31B    | 8.01  |
| VNN1                                                             | 2.31 | ALOX15   | 3.08 | VNN2     | 4.48 | CDHR1     | 8.03  |
| FAM198B                                                          | 2.31 | MS4A3    | 3.10 | AIF1     | 4.56 | GZMK      | 8.41  |
| KLRB1                                                            | 2.32 | GUSBP11  | 3.16 | RPL3P7   | 4.65 | GPR1      | 9.25  |
| HIST1H2AE                                                        | 2.39 | CD72     | 3.20 | CFP      | 4.86 | LY9       | 9.54  |
| MMP9                                                             | 2.42 | MXD1     | 3.21 | S100A12  | 4.93 | CDA       | 12.04 |
| CLCA3P                                                           | 2.43 | RASA3    | 3.25 | BPI      | 5.04 | CAMP      | 12.7  |
| TRAV9-2                                                          | 2.54 | PGLYRP1  | 3.26 | RASGRP2  | 5.31 | DEFA4     | 14.02 |
| CSF3R                                                            | 2.55 | S1PR5    | 3.34 | FAIM3    | 5.32 | NME8      | 18.89 |
| MYB                                                              | 2.61 | IL7R     | 3.39 | VILL     | 5.41 | DPEP2     | 28.70 |
| LILRA2                                                           | 2.61 | CXCR2    | 3.43 | FFAR2    | 5.50 |           |       |

| Up regulated genes in Activated NK Cells (more than 2-fold change) |       |         |      |          |      |
|--------------------------------------------------------------------|-------|---------|------|----------|------|
| LTA                                                                | 0.008 | RRP12   | 0.27 | CRTAM    | 0.40 |
| OSM                                                                | 0.013 | TNFRSF4 | 0.28 | SEPT8    | 0.40 |
| APOL6                                                              | 0.03  | RRP9    | 0.28 | CCR5     | 0.40 |
| SOCS1                                                              | 0.04  | CCL4    | 0.28 | ARRB1    | 0.41 |
| LTB                                                                | 0.05  | RCAN3   | 0.29 | SKA1     | 0.41 |
| CSF2                                                               | 0.06  | CXCL9   | 0.31 | GPR171   | 0.42 |
| IL2RA                                                              | 0.06  | CD69    | 0.32 | TARDBPP1 | 0.43 |
| IFNG                                                               | 0.07  | MMP25   | 0.32 | KIR2DL1  | 0.43 |
| CDC25A                                                             | 0.09  | MICAL3  | 0.33 | SAMSN1   | 0.44 |
| CDK6                                                               | 0.09  | CCL22   | 0.34 | TREML2   | 0.44 |
| DPP4                                                               | 0.10  | KIR2DL4 | 0.35 | RSAD2    | 0.45 |
| EGR2                                                               | 0.11  | ANGPT4  | 0.35 | DCSTAMP  | 0.46 |
| CXCL10                                                             | 0.13  | HIC1    | 0.37 | NCR3     | 0.46 |
| ORC1                                                               | 0.14  | CCR6    | 0.38 | IL3      | 0.47 |
| CXCL11                                                             | 0.15  | IL12RB2 | 0.38 | ST8SIA1  | 0.47 |
| SPAG4                                                              | 0.16  | KIR2DS4 | 0.38 | CCL18    | 0.49 |
| TNFSF14                                                            | 0.17  | CCL1    | 0.38 |          |      |
| CCND2                                                              | 0.17  | CR2     | 0.39 |          |      |
| BIRC3                                                              | 0.24  | FBXL8   | 0.39 |          |      |

**b**

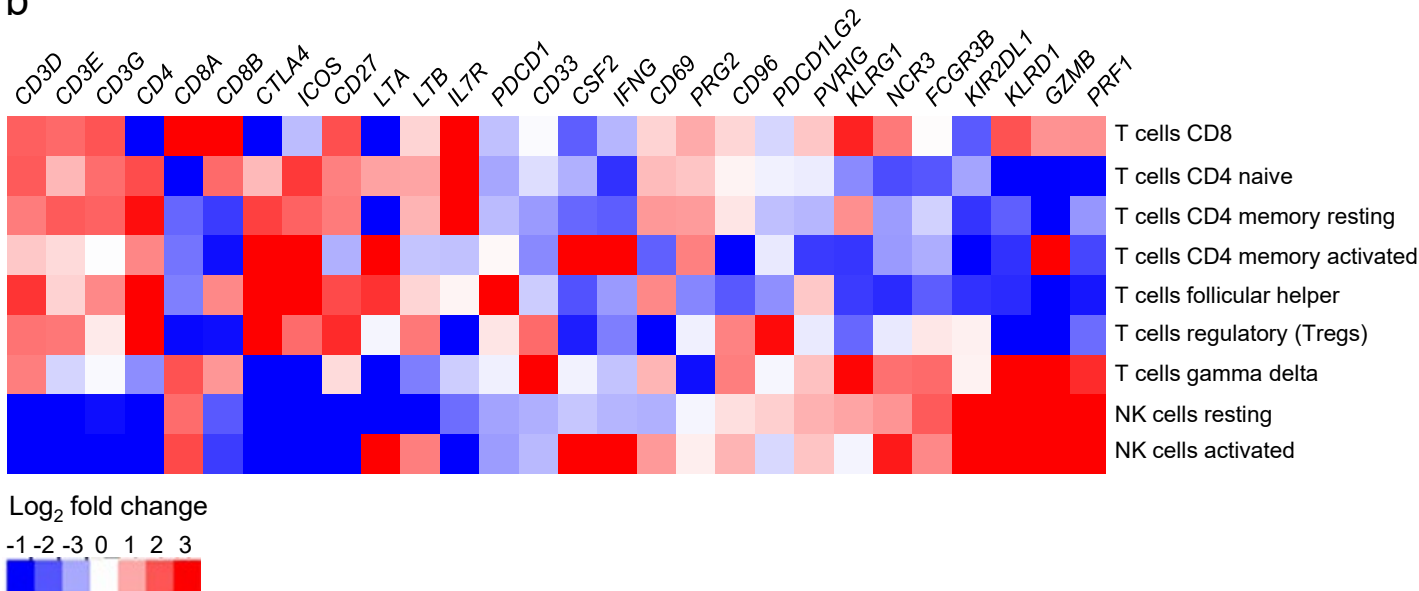

**Figure S12: Gene expression signature of resting and activated NK subsets in LM22 CIBERSORT reference matrix.** (a) List of differentially regulated genes ( $\geq 2$ -fold) between resting and activated NK subsets in LM22 reference matrix used for CIBERSORT to deconvolute COG B-ALL data in Fig.6. (b) Heatmap showing that CIBERSORT LM22 matrix uses expression of lineage markers (e.g., CD3, CD4, CD8) to distinguish between T cells and NK cells.

**Figure S13:** *Poorly prognostic ALL patients with only activated NK cells exhibit chronic NK activation*

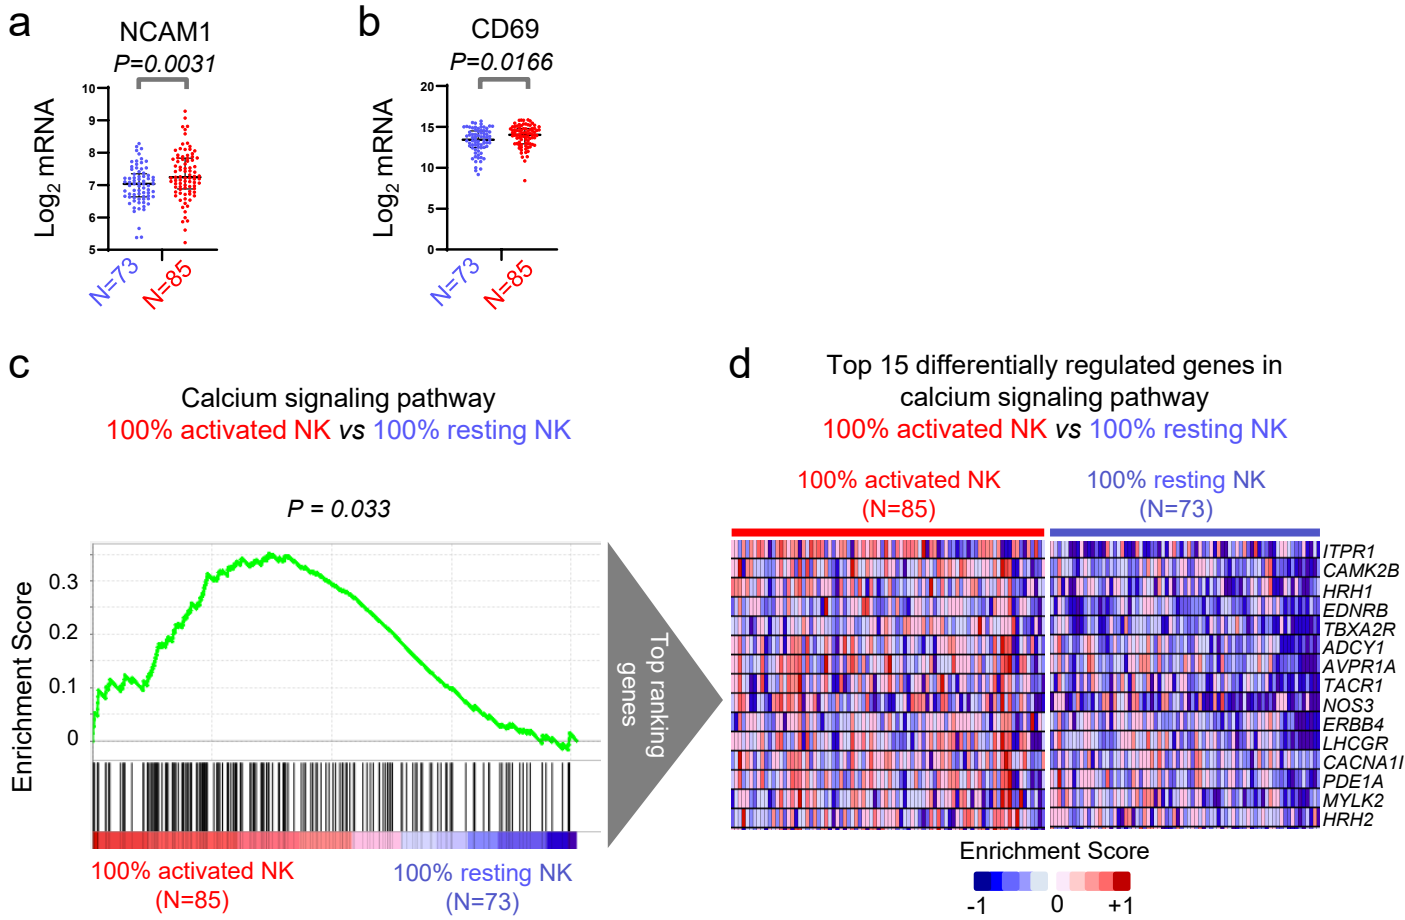

**Figure S13: Poorly prognostic ALL patients with only activated NK cells exhibit chronic NK activation.** (a-b) Comparison of transcript levels of CD56 (a) and CD69 NK activation marker (b) between COG P9906 B-ALL patients with only activated NK (n=85) or only resting NK (n=73) cells. Exact p-values were calculated using Mann-Whitney test. (c-d) Gene set enrichment analysis (GSEA) showing differential regulation of the calcium (Ca<sup>2+</sup>) signaling pathway (c), and heatmap showing top 15 differentially regulated genes within the Ca<sup>2+</sup> signaling pathway (d) between COG P9906 BALL patients with 100% activated NK (n=85) or 100% resting NK (n=73) cells. Exact p-values were calculated in GSEA.

**Figure S14:** NK cell phenotype and functions are similarly altered in pediatric and adult ALL

NK subsets in Adult and Pediatric B-ALL (BMMC)

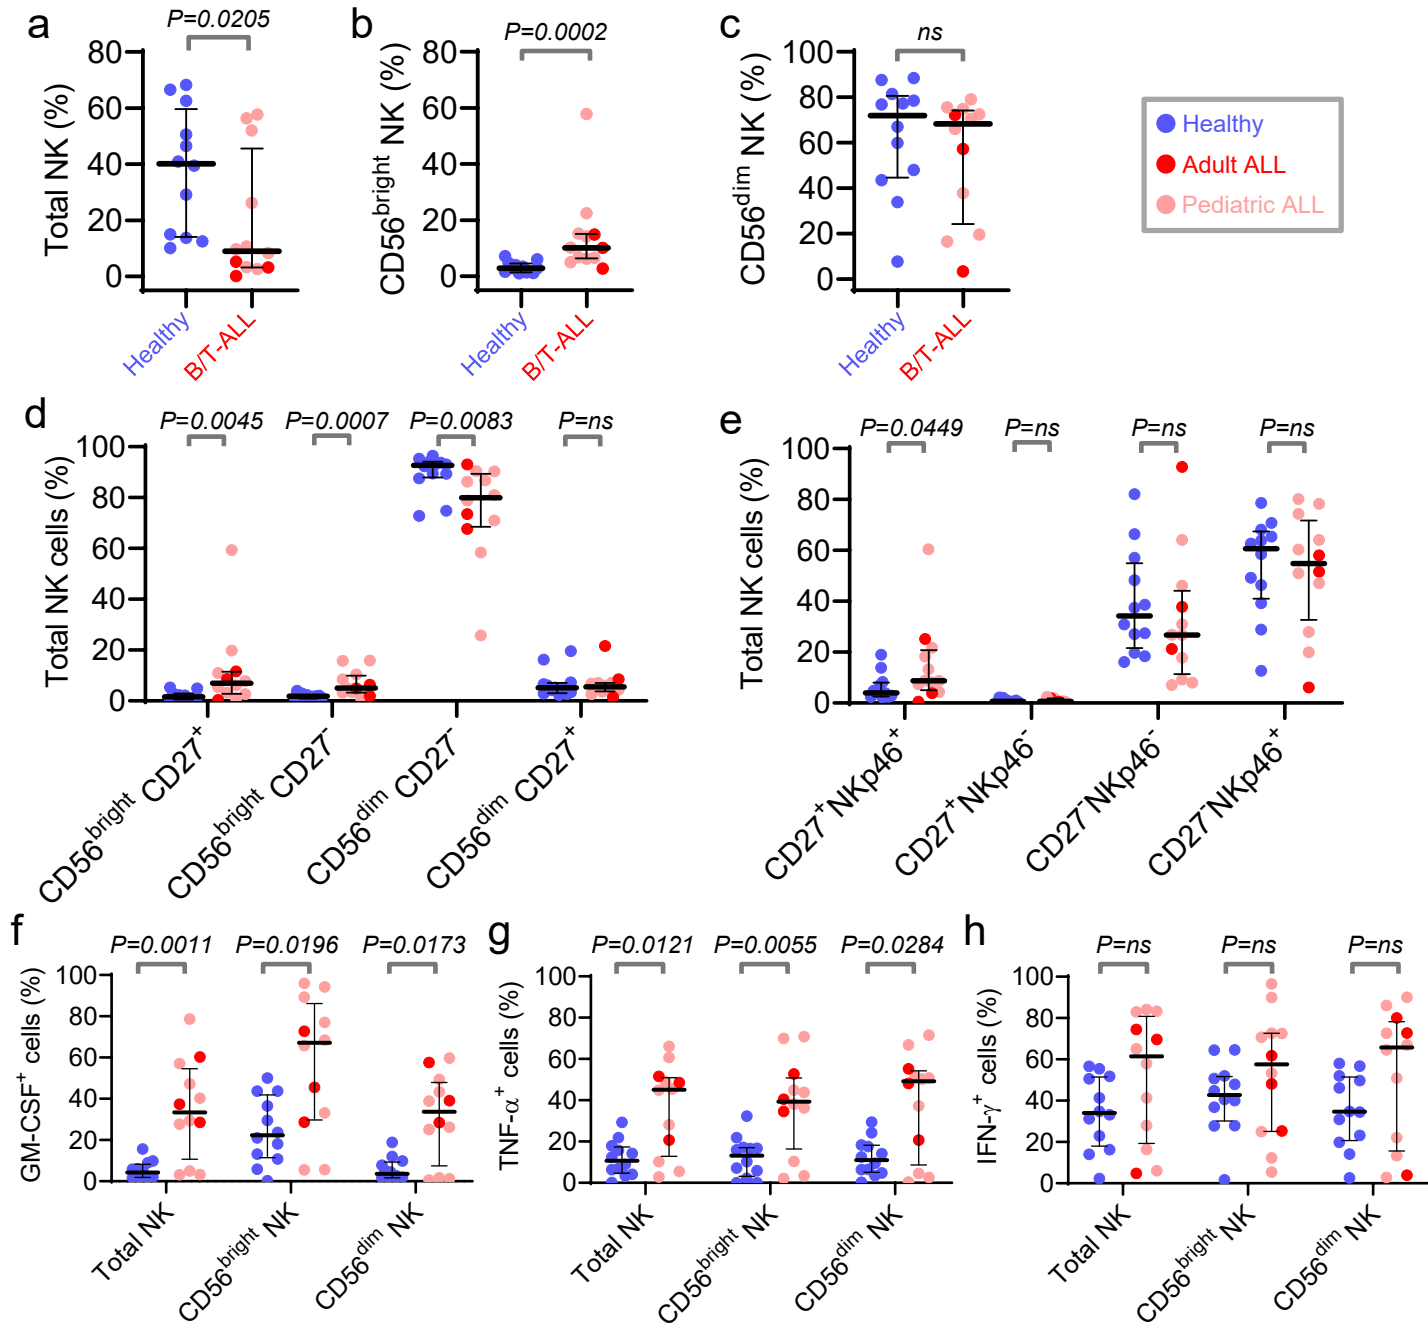

**Figure S14: NK cell phenotype and functions are similarly altered in pediatric and adult ALL.** (a-e)

Comparison by CyTOF analysis of the frequencies of unstimulated NK cell subsets in BMMC from healthy controls (n=12), pediatric B/T-ALL (n=9) and adult B/T-ALL (n=3). Total NK cells as non-monocytes, non-T, non-B, CD56<sup>+</sup> cells (a); CD56<sup>bright</sup> (b) and CD56<sup>dim</sup> NK (c) subsets; CD56<sup>bright</sup>CD27<sup>+</sup>, CD56<sup>bright</sup>CD27<sup>-</sup>, CD56<sup>dim</sup>CD27<sup>-</sup>, CD56<sup>dim</sup>CD27<sup>+</sup> NK fractions (d); and CD27<sup>+</sup>NKp46<sup>+</sup>, CD27<sup>+</sup>NKp46<sup>-</sup>, CD27<sup>-</sup>NKp46<sup>-</sup>, CD27<sup>-</sup>NKp46<sup>+</sup> NK fractions (e). (f-g) Comparison by CyTOF analysis of the frequencies of GM-CSF<sup>+</sup> (f), TNF- $\alpha$ <sup>+</sup> (g), and IFN- $\gamma$ <sup>+</sup> (h) NK cell subsets in BMMC from healthy controls (n=12), pediatric B/T-ALL (n=9) and adult B/T-ALL (n=3) after stimulation by PMA/Ionomycin for 4 hours. Graphs show median  $\pm$  interquartile range. Exact p-values were calculated using Mann-Whitney test, ns=not significant.



**Table S1:** List of high-risk B-ALL and T-ALL patient samples used in the study

| Patient ID      | ALL subtype               | Age  | Sex | Tissue Type | Cytogenetics                                                                               | Translocation /Mutation status                                                   | Disease status | Assay | Source       |
|-----------------|---------------------------|------|-----|-------------|--------------------------------------------------------------------------------------------|----------------------------------------------------------------------------------|----------------|-------|--------------|
| 128             | B-ALL                     | 9.5  | M   | BMMC        | 46,XY,+5,-(9)(p),-13[14]/46,XY[6]                                                          | <i>CDKN2A</i> homozygous deletion (9p-/-)                                        | Diagnosis      | CyTOF | Stanford     |
| 227             | B-ALL                     | 4.9  | M   | BMMC        | Normal, 46,XY male karyotype                                                               | Normal                                                                           | Diagnosis      | CyTOF | Stanford     |
| 268             | B-ALL                     | 12.1 | M   | BMMC        | 47~48,XY,+5,+mar[cp3]/46,XY[18]                                                            | Trisomy 5 clone observed                                                         | Diagnosis      | CyTOF | Stanford     |
| 334             | T-ALL                     | 17.3 | M   | BMMC        | 46,XY,t(10;11)(p12;q14),del(12)(p11.2)[22]                                                 | <i>t(10;11) KMT2A</i> translocation                                              | Diagnosis      | CyTOF | Stanford     |
| 367             | B-ALL                     | 17.9 | M   | BMMC        | 46,XY,del(6)(q13q21),del(7)(p13p15)[9]/46,XY[11]                                           | <i>IGH</i> rearrangement ( <i>t14q32</i> ), <i>CRLF2</i> overexpression, Ph-like | Diagnosis      | CyTOF | Stanford     |
| 393             | B-ALL                     | 17.9 | M   | BMMC        | Normal, 46,XY male karyotype                                                               | Normal                                                                           | Diagnosis      | CyTOF | Stanford     |
| 552             | T-ALL                     | 15.8 | F   | BMMC        | 45,XX,del(1)(p34~36),del(9)(p12),add(10)(p11.2),-11,del(11)(q),-14,add(16)(p13),+mar[cp20] | Unknown                                                                          | Diagnosis      | CyTOF | Stanford     |
| 718             | Burkitt's B cell lymphoma | 14.1 | F   | BMMC        | 46,XX,del(6)(q21),t(8;14)(q24;q32),del(9)(q13q22)[14]/46,XX[10]                            | <i>t(8;14)</i> -mediated <i>MYC</i> rearrangement                                | Diagnosis      | CyTOF | Stanford     |
| 3277            | T-ALL                     | 12.6 | F   | BMMC        | 45,XX,der(8)t(8;14)(q24;q11.2),-14[2]/46,XX[20]                                            | <i>der(8)t(8;14)</i>                                                             | Diagnosis      | CyTOF | Stanford     |
| 6043            | T-ALL                     | 37   | M   | BMMC        | Unknown                                                                                    | <i>NOTCH1</i> mutation                                                           | Diagnosis      | CyTOF | UPENN        |
| 6457            | B-ALL                     | 62   | F   | BMMC        | Unknown                                                                                    | <i>KMT2A</i>                                                                     | Diagnosis      | CyTOF | UPENN        |
| 6487            | T-ALL                     | 72   | M   | BMMC        | 45,X,-Y[8]/46,XY[6]                                                                        | <i>NOTCH1</i> mutation                                                           | Diagnosis      | CyTOF | UPENN        |
| 18067-HTB19-222 | B-ALL                     | 24   | M   | BMMC        | Unknown                                                                                    | <i>JAK2(G)</i> ; <i>JAK2(S)</i>                                                  | Diagnosis      | CyTOF | City of Hope |

**Table S1 contd.:** *List of high-risk B-ALL and T-ALL patient samples used in the study*

| Patient ID       | ALL subtype | Age | Sex | Tissue Type | Cytogenetics                                                                                                     | Translocation /Mutation status     | Disease status | Assay                  | Source       |
|------------------|-------------|-----|-----|-------------|------------------------------------------------------------------------------------------------------------------|------------------------------------|----------------|------------------------|--------------|
| 65               | B-ALL       | 33  | F   | PBMC        | 47 - 48, xx, -4-11, +3-4 probable t(4;11)                                                                        | t(4;11) <i>KMT2A</i> translocation | Diagnosis      | CyTOF                  | UPENN        |
| 779              | B-ALL       | 48  | F   | PBMC        | 46,XX,t(1;11)(p32;q23)[10]/48,idem,+X,+21[10]/fish for <i>KMT2A</i> split pos 163/200 cells/fish for bcr-abl neg | t(1;11) <i>KMT2A</i> translocation | Diagnosis      | CyTOF                  | UPENN        |
| 810              | B-ALL       | 62  | M   | PBMC        | 46,XY[25]                                                                                                        | Unknown                            | Diagnosis      | CyTOF / Flow cytometry | UPENN        |
| 2142             | B-ALL       | 30  | M   | PBMC        | 46,XY,del(9)(p21p21)[6]/46,XY[24]                                                                                | Ph-like                            | Diagnosis      | CyTOF                  | UPENN        |
| 3113             | B-ALL       | 44  | F   | PBMC        | Unknown                                                                                                          | <i>KMT2A/AFF1</i>                  | Diagnosis      | CyTOF                  | UPENN        |
| 4986             | B-ALL       | 41  | M   | PBMC        | 46,XY[5]                                                                                                         | Ph-like                            | Diagnosis      | CyTOF                  | UPENN        |
| 4988             | B-ALL       | 61  | F   | PBMC        | 46,XX,del(7)(p11.2)[7]/46,XX[13]                                                                                 | Ph-like                            | Refractory     | CyTOF                  | UPENN        |
| 5921             | T-ALL       | 32  | M   | PBMC        | 46,XY[20]                                                                                                        | <i>NOTCH1</i> mutation             | Diagnosis      | CyTOF                  | UPENN        |
| 6070             | T-ALL       | 46  | M   | PBMC        | Unknown                                                                                                          | <i>NOTCH1</i> mutation             | Diagnosis      | CyTOF                  | UPENN        |
| 6851             | T-ALL       | 50  | F   | PBMC        | 46,XX[7].ish(ABL1 amp,BCRx2)[1]                                                                                  | Unknown                            | Diagnosis      | CyTOF                  | UPENN        |
| 18067-LTB18-544  | B-ALL       | 24  | M   | PBMC        | Unknown                                                                                                          | <i>JAK2(G); JAK2(S)</i>            | Diagnosis      | CyTOF                  | UPENN        |
| 5385             | T-ALL       | 79  | F   | PBMC        | 46,XX,ins(22;?)(p11.2;?)[14]/46,XX[6]                                                                            | <i>NOTCH1</i> mutation             | Diagnosis      | Flow cytometry         | UPENN        |
| 18067-HTB18-029  | B-ALL       | 57  | F   | PBMC        | Unknown                                                                                                          | <i>JAK2(G); JAK2(S)</i> (Ph-like)  | Diagnosis      | NK cytotoxicity        | City of Hope |
| 18067-HTB19-1382 | B-ALL       | 24  | M   | PBMC        | Normal                                                                                                           | <i>EZH2; ETV6; KMT2D</i>           | Diagnosis      | Flow cytometry         | City of Hope |
| 18067-LTB18-578  | B-ALL       | 44  | F   | PBMC        | Normal                                                                                                           | <i>KMT2D</i>                       | Diagnosis      | Flow cytometry         | City of Hope |

**Table S1 contd.:** List of high-risk B-ALL and T-ALL patient samples used in the study

| Patient ID       | ALL subtype | Age | Sex | Tissue Type | Cytogenetics                                                                                                                                                                          | Translocation /Mutation status                | Disease status | Assay                                         | Source       |
|------------------|-------------|-----|-----|-------------|---------------------------------------------------------------------------------------------------------------------------------------------------------------------------------------|-----------------------------------------------|----------------|-----------------------------------------------|--------------|
| 18067-HTB19-048  | B-ALL       | 20  | F   | PBMC        | 47,XX,+22[6]                                                                                                                                                                          | <i>JAK2; JAK1</i> (Ph-like)                   | Diagnosis      | NK cytotoxicity, Calcium Flux, Flow cytometry | City of Hope |
| 18067-HTB19-937  | B-ALL       | 41  | F   | PBMC        | 46,XX[16].ish t(X;14)(p22.33;q32.33)(5'IGH+;3'IGH+)[2]                                                                                                                                | <i>IKZF1; JAK2(G); JAK2(S);PAX5</i> (Ph-like) | Diagnosis      | Calcium Flux, Flow cytometry                  | City of Hope |
| 18067-HTB19-001  | B-ALL       | 35  | F   | PBMC        | 47,XX,+X[9]                                                                                                                                                                           | <i>JAK2; NRAS</i> (Ph-like)                   | Diagnosis      | Calcium Flux, Flow cytometry                  | City of Hope |
| 18067-HTB19-376  | B-ALL       | 30  | F   | PBMC        | Unknown                                                                                                                                                                               | <i>KMT2D</i>                                  | Diagnosis      | Calcium Flux                                  | City of Hope |
| 18067-LTB18-010  | B-ALL       | 20  | F   | PBMC        | 50,XX,+X,+2,+4,t(9;22)(q34.1;q11.2),+der(22)t(9;22)[4]                                                                                                                                | Hi Risk, no Mutations                         | Diagnosis      | Flow cytometry                                | City of Hope |
| 18067-HTB19-289  | B-ALL       | 43  | F   | PBMC        | 47,XX,-2,t(3;15)(p23;q15),del(5)(q22q373),del(7)(p13p15),+del(9)(p21.2),der(9)del(9)(p13p22)del(9)(q22)x2,der(10)t(2;10)(q21;q26),del(12)(p11.2p13.3),add(17)(q25)x2,-20,+21,+mar[17] | <i>KRAS; KMT2D; PAX5</i>                      | Diagnosis      | Flow cytometry                                | City of Hope |
| 18067-LTB18-544  | B-ALL       | 24  | M   | PBMC        | 47,XY,+X[6]                                                                                                                                                                           | <i>JAK2(G); JAK2(S)</i> (Ph-like)             | Diagnosis      | Calcium Flux                                  | City of Hope |
| 18067-HTB19-1420 | B-ALL       | 54  | F   | PBMC        | 46,XX,t(9;22)(q34.1;q11.2)[6]; 48,sl,+4,-16,+21,der(22)t(9;22) add(9)(q34.3),+der(22)t(9;22) add(9)[11] 47,sd1,t(5;12)(q33;q13),-21[3]                                                | <i>KMT2C</i>                                  | Diagnosis      | NK cytotoxicity                               | City of Hope |

**Table S2:** *Antibodies used for CyTOF immunophenotyping (Panel 1)*

| <b>Metal label</b> | <b>Target</b> | <b>Clone</b> | <b>Source</b>       | <b>Concentration<br/>(<math>\mu\text{g/mL}</math>)</b> | <b>Titre<br/>(<math>\mu\text{g/mL}</math>)</b> |
|--------------------|---------------|--------------|---------------------|--------------------------------------------------------|------------------------------------------------|
| 113In              | CD57          | HNK1         | Custom, Biolegend   | 265                                                    | 2.5                                            |
| 141Pr              | HLA-DR        | L243         | Custom, Biolegend   | 425                                                    | 2                                              |
| 142Nd              | CD19          | HIB19        | Fluidigm            | 500                                                    | 5                                              |
| 145Nd              | CD4           | RPA-T4       | Fluidigm            | 500                                                    | 5                                              |
| 146Nd              | CD8           | RPA-T8       | Fluidigm            | 500                                                    | 5                                              |
| 147Sm              | CD20          | 2H7          | Fluidigm            | 500                                                    | 5                                              |
| 149Sm              | CTLA-4        | 14D3         | Custom, eBioscience | 510                                                    | 5                                              |
| 150Nd              | MIP-1 $\beta$ | D21-1351     | Fluidigm            | 500                                                    | 5                                              |
| 151Eu              | CD107a        | H4A3         | Fluidigm            | 500                                                    | 5                                              |
| 152Sm              | TNF- $\alpha$ | Mab11        | Fluidigm            | 500                                                    | 5                                              |
| 153Eu              | CD45RA        | HI100        | Fluidigm            | 500                                                    | 5                                              |
| 154Sm              | CD3           | UCHT1        | Fluidigm            | 500                                                    | 5                                              |
| 158Gd              | CD33          | WM53         | Fluidigm            | 500                                                    | 5                                              |
| 159Tb              | GM-CSF        | BVD2-21C11   | Fluidigm            | 500                                                    | 5                                              |
| 160Gd              | CD14          | M5E2         | Fluidigm            | 500                                                    | 5                                              |
| 161Dy              | IFN- $\gamma$ | 4S.B3        | Custom, Biolegend   | 660                                                    | 2.5                                            |
| 162Dy              | NKp46         | BAB281       | Fluidigm            | 500                                                    | 5                                              |
| 166Er              | IL-2          | MQ1-17h12    | Fluidigm            | 500                                                    | 5                                              |
| 167Er              | CD27          | L128         | Fluidigm            | 500                                                    | 5                                              |
| 170Er              | PD1           | EH12.1, BD   | Fluidigm            | 500                                                    | 2.5                                            |
| 171Yb              | Granzyme B    | GB11         | Fluidigm            | 500                                                    | 5                                              |
| 172Yb              | PD-L2         | 24F.10C12    | Fluidigm            | 500                                                    | 5                                              |
| 173Yb              | Perforin      | B-D48        | Custom, Abcam       | 500                                                    | 2.5                                            |
| 175Lu              | PD-L1         | 29E.2A3      | Fluidigm            | 500                                                    | 5                                              |
| 176Yb              | CD56          | NCAM16.2     | Fluidigm            | 500                                                    | 5                                              |
| 209Bi              | CD16          | 3G8          | Fluidigm            | 500                                                    | 5                                              |

**Table S3:** *Antibodies used for CyTOF immunophenotyping (Panel 2)*

| <b>Metal label</b> | <b>Target</b> | <b>Clone</b> | <b>Source</b>       | <b>Concentration<br/>(<math>\mu\text{g/mL}</math>)</b> | <b>Titre<br/>(<math>\mu\text{g/mL}</math>)</b> |
|--------------------|---------------|--------------|---------------------|--------------------------------------------------------|------------------------------------------------|
| 113In              | CD57          | HNK1         | Custom, Biolegend   | 265                                                    | 2.5                                            |
| 141Pr              | HLA-DR        | L243         | Custom, Biolegend   | 425                                                    | 2                                              |
| 142Nd              | CD19          | HIB19        | Fluidigm            | 500                                                    | 5                                              |
| 145Nd              | CD4           | RPA-T4       | Fluidigm            | 500                                                    | 5                                              |
| 146Nd              | CD8           | RPA-T8       | Fluidigm            | 500                                                    | 5                                              |
| 147Sm              | CD20          | 2H7          | Fluidigm            | 500                                                    | 5                                              |
| 148Nd              | ICOS          | C398.4A      | Fluidigm            | 500                                                    | 5                                              |
| 149Sm              | CTLA-4        | 14D3         | Custom, eBioscience | 510                                                    | 5                                              |
| 152Sm              | TNF- $\alpha$ | Mab11        | Fluidigm            | 500                                                    | 5                                              |
| 153Eu              | TIGIT         | MBSA43       | Fluidigm            | 500                                                    | 5                                              |
| 154Sm              | CD3           | UCHT1        | Fluidigm            | 500                                                    | 5                                              |
| 157Gd              | ILT2          | GHI/75       | Custom, Biolengend  | 460                                                    | 5                                              |
| 158Gd              | CD33          | WM53         | Fluidigm            | 500                                                    | 5                                              |
| 159Tb              | GM-CSF        | BVD2-21C11   | Fluidigm            | 500                                                    | 5                                              |
| 160Gd              | CD14          | M5E2         | Fluidigm            | 500                                                    | 5                                              |
| 161Dy              | IFN- $\gamma$ | 4S.B3        | Custom, Biolegend   | 660                                                    | 2.5                                            |
| 162Dy              | NKp46         | BAB281       | Fluidigm            | 500                                                    | 5                                              |
| 163Dy              | Siglec-7      | 6-434        | Custom, Biolegend   | 215                                                    | 2                                              |
| 164Dy              | KLRG1         | SA231A2      | Custom, Biolegend   | 445                                                    | 2                                              |
| 165Ho              | LAG-3         | 11C3C65      | Fluidigm            | 500                                                    | 5                                              |
| 167Er              | CD27          | L128         | Fluidigm            | 500                                                    | 5                                              |
| 168Er              | Ki-67         | B56          | Fluidigm            | 500                                                    | 5                                              |
| 169Tm              | TIM-3         | F38-2E2      | Fluidigm            | 500                                                    | 5                                              |
| 170Er              | PD1           | EH12.1, BD   | Fluidigm            | 500                                                    | 2.5                                            |
| 172Yb              | PD-L2         | 24F.10C12    | Fluidigm            | 500                                                    | 5                                              |
| 175Lu              | PD-L1         | 29E.2A3      | Fluidigm            | 500                                                    | 5                                              |
| 176Yb              | CD56          | NCAM16.2     | Fluidigm            | 500                                                    | 5                                              |
| 209Bi              | CD16          | 3G8          | Fluidigm            | 500                                                    | 5                                              |

**Table S4:** *Reagents and antibodies used for flow cytometry*

| Name              | Fluorophore | Clone    | Dilution/<br>Concentration | Source                  |
|-------------------|-------------|----------|----------------------------|-------------------------|
| Anti-human CD3    | FITC        | UCHT1    | 1:100                      | Biolegend               |
| Anti-human CD56   | APC         | 5.1H11   | 1:100                      | Biolegend               |
| Anti-human CD45   | PerCP/FITC  | 2D1      | 1:100                      | Biolegend               |
| Anti-human CD94   | PECY7       | DX22     | 1:100                      | Biolegend               |
| Anti-human NKp44  | PE          | P44-8    | 1:100                      | Biolegend               |
| Anti-human CD62L  | PECY5       | DREG-56  | 1:100                      | Biolegend               |
| Anti-human DNAM-1 | BV605       | 11A8     | 1:100                      | Biolegend               |
| Anti-human CD11b  | APC-R700    | M1/70    | 1:100                      | BD                      |
| Anti-human CD27   | PE          | M-T271   | 3:100                      | BD                      |
| Anti-human CD16   | BV711       | 3G8      | 1:100                      | BD                      |
| Anti-human CD158a | BV421       | HP-3E4   | 1:100                      | BD                      |
| Anti-human NKG2A  | BV605       | 131411   | 1:100                      | BD                      |
| Anti-human NKp30  | BV750       | P30-15   | 1:100                      | BD                      |
| Anti-human CD56   | BV510       | NCAM16.2 | 1:100                      | BD                      |
| Anti-human CD3    | BUV805      | UCHT1    | 1:100                      | BD                      |
| Anti-human CD69   | BUV737      | FN50     | 1:100                      | BD                      |
| Anti-human CD19   | BUV661      | HIB19    | 1:100                      | BD                      |
| Anti-human CD14   | BUV395      | M5E2     | 1:100                      | BD                      |
| Ghost-Dye UV450   | NA          | NA       | 1:100                      | Tonbo Biosciences       |
| Indo-AM           | NA          | NA       | 1.5µM                      | ThermoFisher Scientific |
| 7AAD              | NA          | NA       | 1:100                      | Biolegend               |
| DAPI              | NA          | NA       | 300nM                      | Biolegend               |

**Table S5:** *Number of NK cell events acquired by CyTOF and flow cytometry*

| Sample Name      | Tissue | ALL subtype               | Assay          | Unstimulated NK cell events | Stimulated NK cell events |
|------------------|--------|---------------------------|----------------|-----------------------------|---------------------------|
| 128              | BMMC   | B-ALL                     | CyTOF          | 4346                        | 3512                      |
| 227              | BMMC   | B-ALL                     | CyTOF          | 2899                        | 2571                      |
| 268              | BMMC   | B-ALL                     | CyTOF          | 327                         | 328                       |
| 367              | BMMC   | B-ALL                     | CyTOF          | 10242                       | 10918                     |
| 393              | BMMC   | B-ALL                     | CyTOF          | 1847                        | 1733                      |
| 718              | BMMC   | Burkitt's B cell lymphoma | CyTOF          | 989                         | 855                       |
| 6457             | BMMC   | B-ALL                     | CyTOF          | 289                         | 282                       |
| 18067-HTB19-222  | BMMC   | B-ALL                     | CyTOF          | 852                         | 2284                      |
| 334              | BMMC   | T-ALL                     | CyTOF          | 15189                       | 11964                     |
| 552              | BMMC   | T-ALL                     | CyTOF          | 4016                        | 4667                      |
| 3277             | BMMC   | T-ALL                     | CyTOF          | 10001                       | 9702                      |
| 6043             | BMMC   | T-ALL                     | CyTOF          | 1783                        | 1463                      |
| 6487             | BMMC   | T-ALL                     | CyTOF          | 31503                       | 36981                     |
| 65               | PBMC   | B-ALL                     | CyTOF          | 625                         | 540                       |
| 779              | PBMC   | B-ALL                     | CyTOF          | 1511                        | 1461                      |
| 810              | PBMC   | B-ALL                     | CyTOF          | 1356                        | 6584                      |
| 2142             | PBMC   | B-ALL                     | CyTOF          | 3760                        | 3149                      |
| 3113             | PBMC   | B-ALL                     | CyTOF          | 3577                        | 3167                      |
| 4986             | PBMC   | B-ALL                     | CyTOF          | 2150                        | 2150                      |
| 4988             | PBMC   | B-ALL                     | CyTOF          | 2315                        | 2249                      |
| 18067-LTB18-544  | PBMC   | B-ALL                     | CyTOF          | 1500                        | 1855                      |
| 5921             | PBMC   | T-ALL                     | CyTOF          | 2513                        | 2812                      |
| 6070             | PBMC   | T-ALL                     | CyTOF          | 3425                        | 3377                      |
| 6851             | PBMC   | T-ALL                     | CyTOF          | 14617                       | 1477                      |
| 18067-LTB18-010  | PBMC   | B-ALL                     | Flow Cytometry | 4487                        | NA                        |
| 18067-HTB19-289  | PBMC   | B-ALL                     | Flow Cytometry | 195                         | NA                        |
| 18067-LTB18-578  | PBMC   | B-ALL                     | Flow Cytometry | 4324                        | NA                        |
| 18067-HTB19-001  | PBMC   | B-ALL                     | Flow Cytometry | 2233                        | NA                        |
| 18067-HTB19-1382 | PBMC   | B-ALL                     | Flow Cytometry | 3019                        | NA                        |
| 18067-HTB19-048  | PBMC   | B-ALL                     | Flow Cytometry | 3412                        | NA                        |
| 18067-HTB19-937  | PBMC   | B-ALL                     | Flow Cytometry | 4881                        | NA                        |
| 810              | PBMC   | B-ALL                     | Flow Cytometry | 3152                        | NA                        |
| 5385             | PBMC   | T-ALL                     | Flow Cytometry | 1715                        | NA                        |
